# Supplementary material for: Prolonged Scar-in-a-Jar: an in vitro screening tool for anti-fibrotic therapies using biomarkers of extracellular matrix synthesis
Source: Springer Nature journal article supplement (doi:10.1186/s12931-020-01369-1), 2020-05-07
Supplement: MOESM1 [file 17962648]

# Supplementary material for “Prolonged Scar-in-a-Jar: an *in vitro* screening tool for anti-fibrotic therapies using biomarkers of extracellular matrix synthesis”

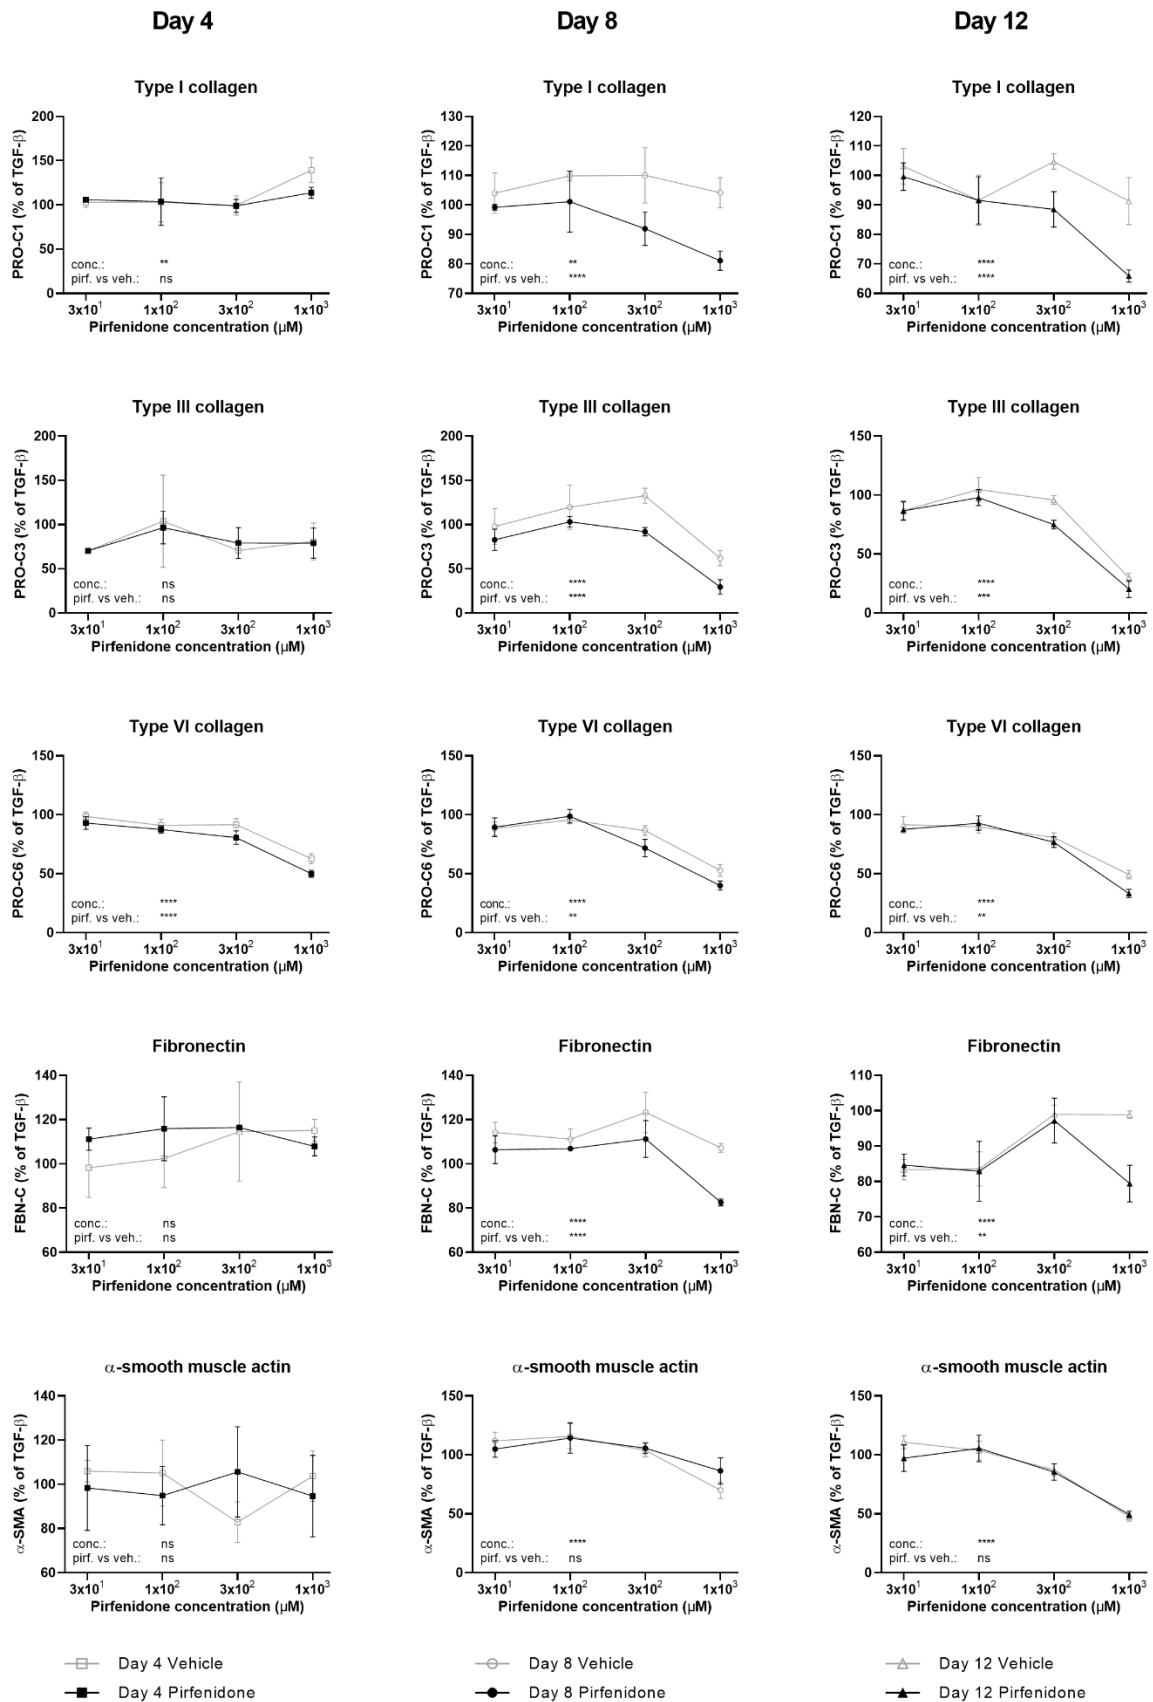

### **Supplementary figure 1: Effect of pirfenidone shown by day**

Lung fibroblasts were stimulated with TGF- $\beta$ 1 and treated with  $3 \times 10^1$ ,  $1 \times 10^2$ ,  $3 \times 10^2$  or  $1 \times 10^3$   $\mu$ M pirfenidone or corresponding vehicle (0.03%, 0.1%, 0.3% or 1% DMSO). Biomarkers of ECM synthesis (type I (PRO-C1), III (PRO-C3) and VI (PRO-C6) collagen and fibronectin (FBN-C)) and fibroblast activation ( $\alpha$ -SMA) were measured in the supernatant at day 4, 8 and 12. Data are shown as dose-response curves for pirfenidone and its vehicle for the different timepoints and are presented as percentage of the TGF- $\beta$ 1 control over time. All data are shown as mean $\pm$ SD of 3 separate experiments each with 4 replicates/treatment and analyzed by two-way ANOVA with Sidak's multiple comparisons test comparing pirfenidone to vehicle. ns non-significant; \*P<0.05; \*\*P<0.01; \*\*\*P<0.001; \*\*\*\*P<0.0001.
